# Supplementary material for: Enantiomeric poly(d-lactide) with a higher melting point served as a significant nucleating agent for poly(l-lactide)
Source: Royal Society of Chemistry journal article supplement (doi:10.1039/c5ce00645g), 2015-01-01
Supplement: c5ce00645g1.pdf [file c5ce00645g1.pdf]

**Supporting information for**

**Enantiomeric Poly(D-lactide) with a Higher Melting Point  
Served as Significant Nucleating Agent for Poly(L-lactide)**

Hai-Yan Yin<sup>a</sup>, Xin-Feng Wei<sup>a</sup>, Rui-Ying Bao<sup>a\*</sup>, Quan-Xiao Dong<sup>b</sup>, Zheng-Ying Liu<sup>a</sup>, Wei Yang<sup>a\*</sup>, B  
ang-Hu Xie<sup>a</sup>, Ming-Bo Yang<sup>a</sup>

<sup>a</sup> College of Polymer Science and Engineering, Sichuan University, State Key Laboratory of  
Polymer Materials Engineering, Chengdu, 610065 Sichuan, China

<sup>b</sup> Beijing Engineering Research Center of Architectural Functional Macromolecular Materials,  
Beijing Building Construction Research Institute, Beijing, People's Republic of China 100039

---

\*Corresponding authors. Tel/Fax: + 86 28 8546 0130. E-mail address: [weiyang@scu.edu.cn](mailto:weiyang@scu.edu.cn) (W. Yang) and  
[baoruiying2005@126.com](mailto:baoruiying2005@126.com) (RY Bao).

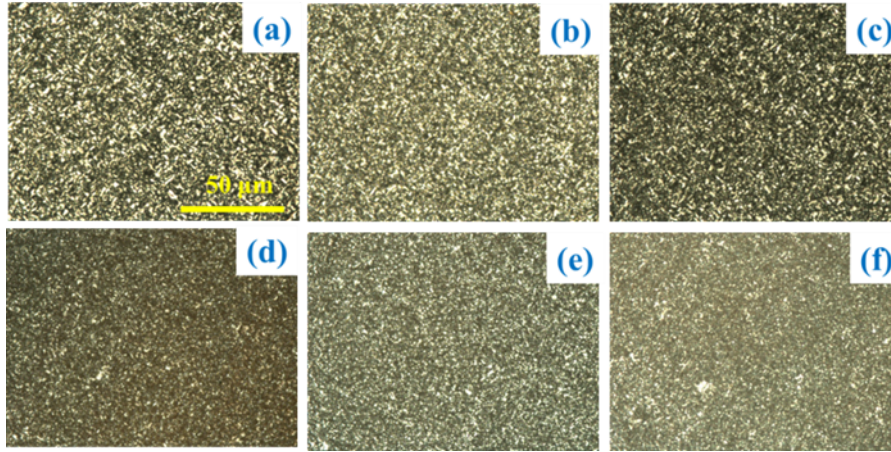

**Fig. S1** Final morphologies of (a) *hPDLA*-0.1 (b) *hPDLA*-0.3 (c) *hPDLA*-0.5 (d) *hPDLA*-1.0 (e) *hPDLA*-3.0 (f) *hPDLA*-5.0 at  $T_c$  of 130 °C. The scale bar in panel (a) applies to all the micrographs.

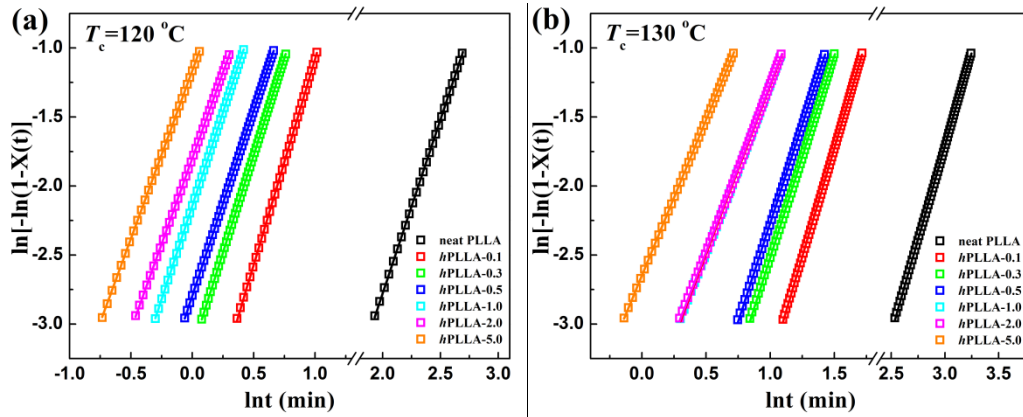

**Fig. S2.** Avrami plots of  $\ln[-\ln(1 - X_t)]$  versus  $\ln t$  for neat PLLA and the blends at  $T_c$  of (a) 120 °C and (b) 130 °C.

Based on the DSC data in Fig. 6, the isothermal crystallization kinetics of PLLA in the blends crystallized at 120 and 130 °C were analyzed by the Avrami equation as follows:<sup>1,2</sup>

$$1 - X_t = \exp[-k(T)t^n] \quad (1)$$

where  $n$  is the Avrami index and  $K(T)$  is the overall rate constant. The linear form of eq 1 can be stated as:

$$\ln[-\ln(1 - X_t)] = \ln k(T) + n \ln t \quad (2)$$

$k(T)$  and  $n$  can be estimated from the linear fitting of  $\ln[-\ln(1 - X_t)]$  vs  $\ln t$ . To ensure the accuracy of the Avrami analysis, the data in a limited conversion range (3 – 30%) was employed for fitting. The obtained data were shown in Fig.S2.

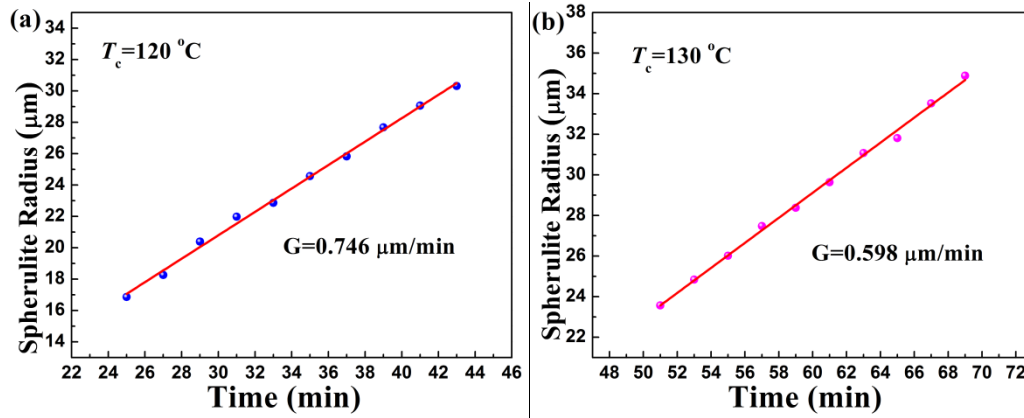

**Fig. S3.** The spherulite radius as a function of time for neat PLLA at  $T_c$  of (a) 120 °C and (b) 130 °C, the sample was first melting at 180 °C for 3 min and then cooled to  $T_c$  at 40 °C/min.

## References

1. M. Avrami, *The Journal of Chemical Physics*, 1939, **7**, 1103-1112.
2. M. Avrami, *The Journal of Chemical Physics*, 1940, **8**, 212-224.
